# Supplementary material for: Low Electric Treatment activates Rho GTPase via Heat Shock Protein 90 and Protein Kinase C for Intracellular Delivery of siRNA
Source: PubMed Central journal article supplement (PMC6412017; doi:10.1038/s41598-019-40904-z), 2019-03-11
Supplement: 41598_2019_40904_MOESM1_ESM.pdf [file 41598_2019_40904_MOESM1_ESM.pdf]

## Supplementary Information

**Title:** Low Electric Treatment activates Rho GTPase via Heat Shock Protein 90 and Protein Kinase C for Intracellular Delivery of siRNA

Author names:

Mahadi Hasan<sup>1,2,3</sup>, Susumu Hama<sup>1</sup> and Kentaro Kogure<sup>2</sup>

Affiliations:

<sup>1</sup>Department of Biophysical Chemistry, Kyoto Pharmaceutical University, Kyoto 607-8414, Japan;

<sup>2</sup>Department of Pharmaceutical Health Chemistry, Tokushima University Graduate School of Biomedical Sciences, Tokushima 770-8505 Japan .

<sup>3</sup>JSPS International Research Fellow

**GO slim analysis of GO term-attached proteins among the top Top 15 phosphorylated proteins upregulated by LET**

| Names    | Cellular component                                                                                             | Molecular function                                     | Biological process   |
|----------|----------------------------------------------------------------------------------------------------------------|--------------------------------------------------------|----------------------|
| Hnrnpc   | Cell; intracellular; organelle; cytoplasm; nucleus; cytosol; nucleoplasm; protein complex                      | RNA binding; mRNA binding                              | N.D                  |
| Pdap1    | Extracellular space, extracellular region                                                                      | RNA binding                                            | N.D                  |
| Mtdh     | Cell; intracellular; organelle; cytoplasm; nucleus; endoplasmic reticulum; nucleolus                           | RNA binding                                            | N.D                  |
| Hmgbl    | Cell; intracellular; organelle; cytoplasm; nucleus; plasma membrane; extracellular space; extracellular region | Lyase activity                                         | N.D                  |
| Marcks   | Cell; intracellular; cytoplasm                                                                                 | N.D                                                    | N.D                  |
| Eef1b2   | Cell; intracellular; organelle; cytoplasm; endoplasmic reticulum;                                              | N.D                                                    | N.D                  |
| Hsp90aa1 | Cell; intracellular; organelle; cytoplasm; nucleus; cytosol; protein complex                                   | RNA binding; unfolded protein binding; ATPase activity | N.D                  |
| Huwe1    | Cell; intracellular; organelle; cytoplasm; nucleus; cytosol; nucleoplasm;                                      | RNA binding; DNA binding                               | Cell differentiation |

N.D.: Not determined

**Physicochemical properties of liposomes**

|               | Particle size (nm) | $\zeta$ -potential (mV) |
|---------------|--------------------|-------------------------|
| Cationic lipo | 96 $\pm$ 8.1       | 10 $\pm$ 1.9            |
| Anionic lipo  | 97 $\pm$ 14        | -17 $\pm$ 3.1           |
| PEG-lipo      | 87 $\pm$ 7.8       | -1.8 $\pm$ 0.47         |

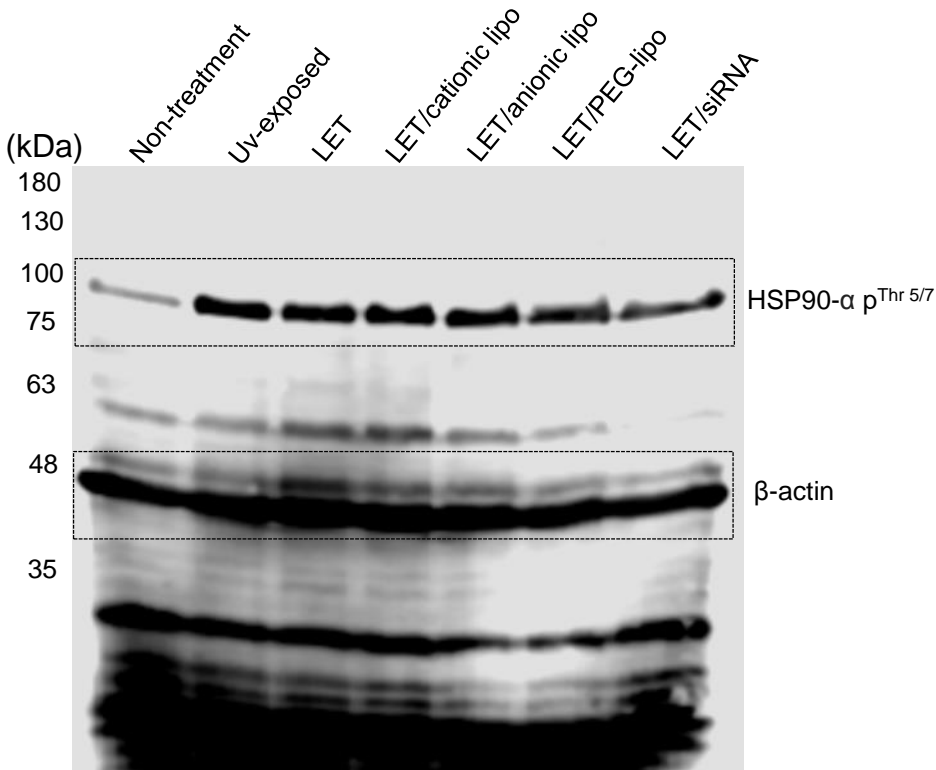

Full-length blots regarding figure 2 (a)

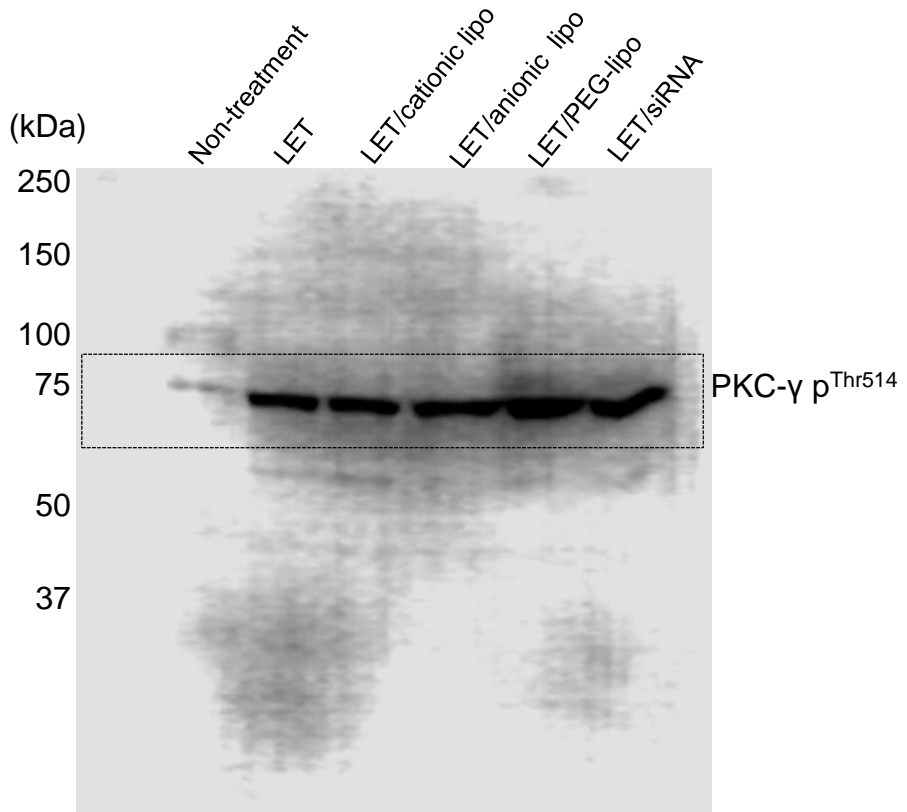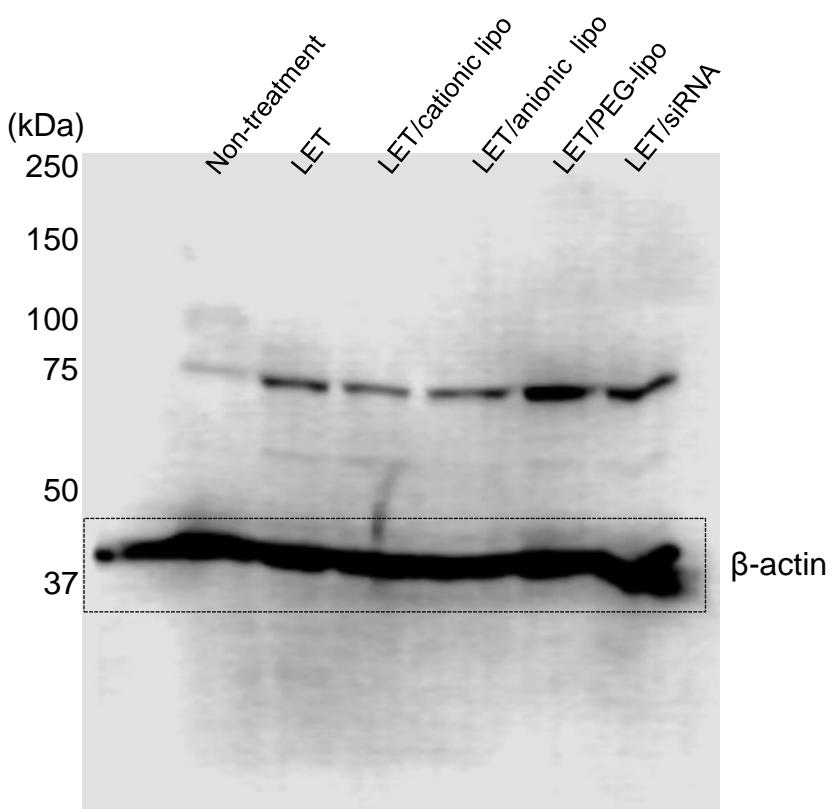

Full-length blots regarding figure 3 (a)

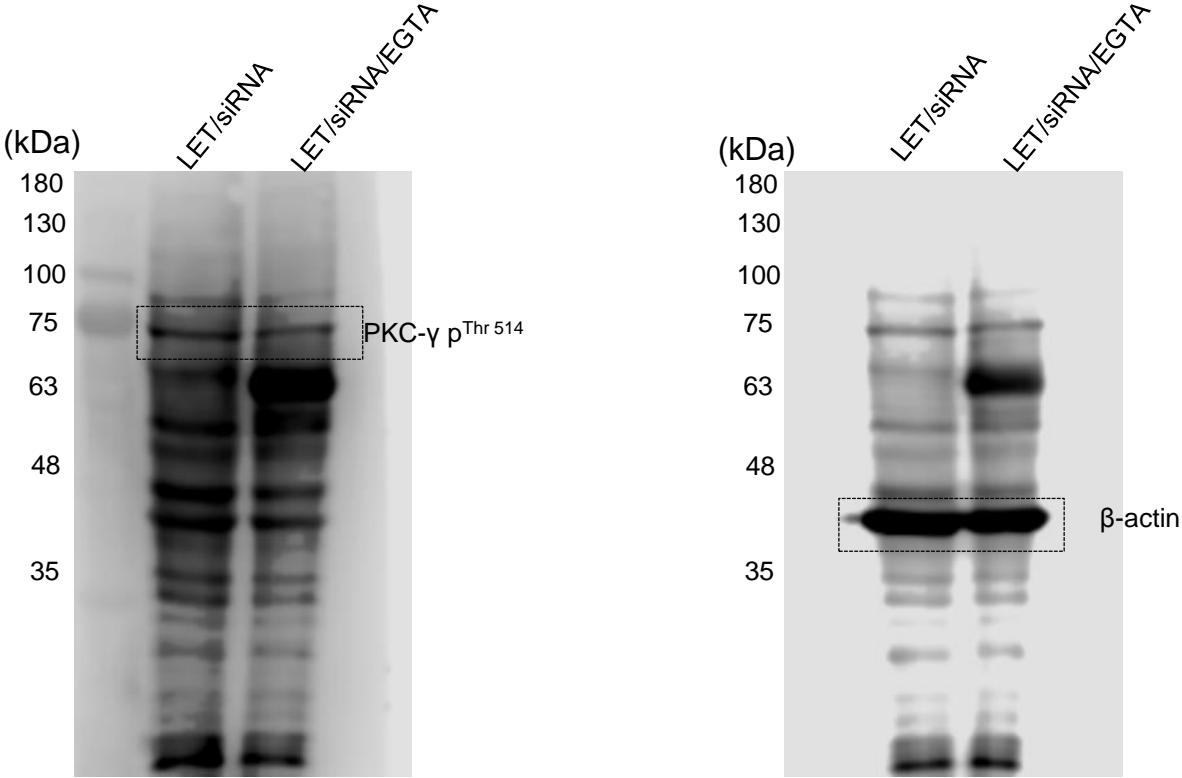

Full-length blots regarding figure 3 (d)

Supplementary Fig. S4

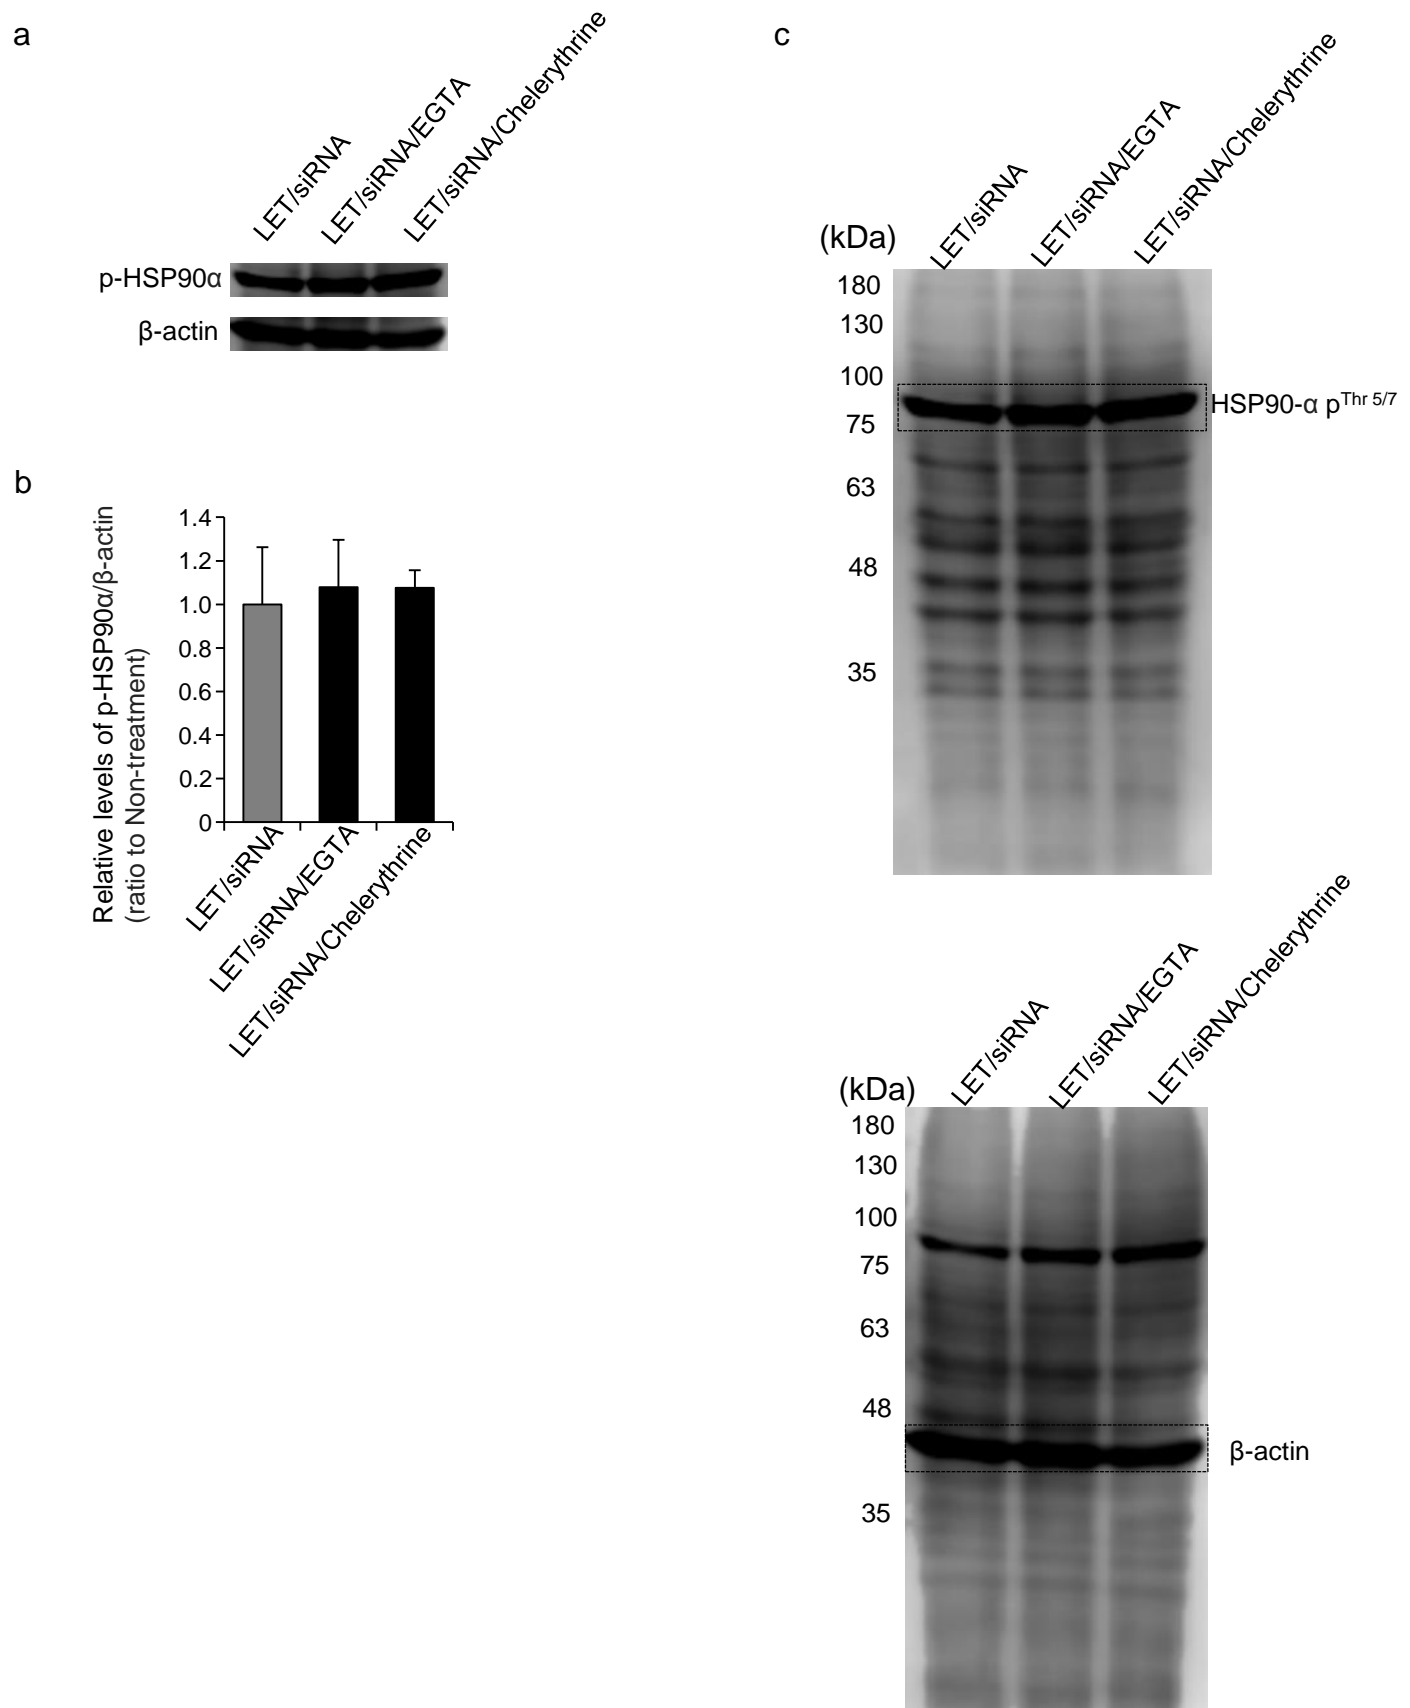

**Effects of EGTA and chelerythrine on Hsp90α phosphorylation induced by LET with siRNA**

Cells were pretreated with EGTA or chelerythrine for 30 min prior to the LET in presence of siRNA. Phospho-Hsp90α (Thr5/7) levels were determined by western blotting. β-actin was used as a loading control. (a) Typical images from at least 3 individual experiments. (b) Relative levels p-Hsp90α/β-actin. Data are shown as the ratio to non-treatment. Values represent the means of 3 individual experiments. Bars represent standard deviations. (c) Full-length blots regarding Fig. S4a

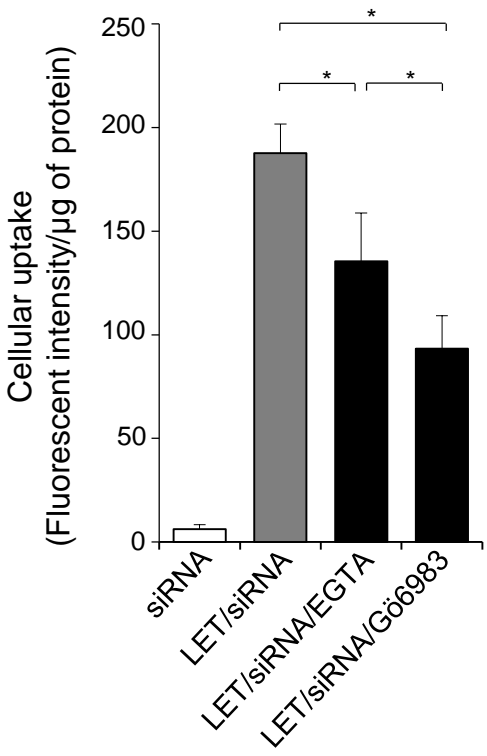

**Effects of EGTA or PKC inhibitor Gö6983 on cellular uptake of siRNA**

NIH3T3 cells were pretreated with EGTA or PKC inhibitor Gö6983 prior to LET in presence of rhodamine-labeled siRNA. After incubation for 45 min, cells were lysed, and fluorescence intensity in the lysate was measured. Values represent the means of 3 individual experiments. Bars represent standard deviations. \* $p < 0.05$ .



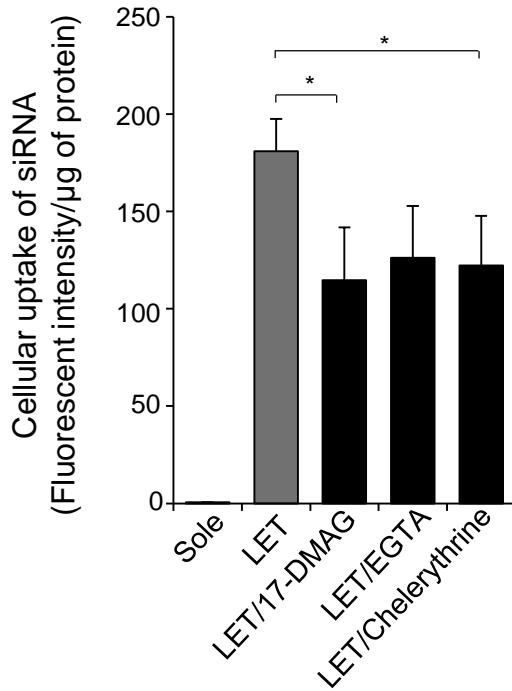

**Effects of Hsp90 inhibitor, EGTA or PKC inhibitor on cellular uptake of siRNA in B16-F1 cells**

B16-F1 cells were pretreated with 17-DMAG, EGTA or Chelerythrine prior to LET in presence of rhodamine-labeled siRNA. After incubation for 45 min, cells were lysed, and fluorescence intensity in the lysate was measured. Values represent the means of 3 individual experiments. Bars represent standard deviations. \* $p < 0.05$ .
